# Supplementary material
Source: Research Square preprint supplement (doi:10.21203/rs.3.rs-9380086/v1)
Supplement: Supplementary file 1 [file c44c9fa220bb21adfa82e39c.docx]

**Supplementary Table S1. Cancer type and chemotherapy regimen**

|  |  | Metformin | |  | SGLT2i | | SMD |
| --- | --- | --- | --- | --- | --- | --- | --- |
|  |  | n | % |  | n | % |
|  |  | 94 |  |  | 62 |  |
| Cancer type | Esophageal | 19 | 20.2 |  | 14 | 22.6 | 0.059 |
|  | Gastric | 6 | 6.4 |  | 1 | 1.6 | 0.247 |
|  | Gynecological | 7 | 7.4 |  | 4 | 6.5 | 0.035 |
|  | Head and neck | 13 | 13.8 |  | 9 | 14.5 | 0.020 |
|  | NSCLC | 28 | 29.8 |  | 20 | 32.3 | 0.408 |
|  | SCLC | 12 | 12.8 |  | 10 | 16.1 | 0.094 |
|  | Urological | 5 | 5.3 |  | 2 | 3.2 | 0.104 |
|  | Other | 4 | 4.3 |  | 2 | 3.2 | 0.058 |
| Chemotherapy regimen | CDDP+5FU | 17 | 18.1 |  | 10 | 16.1 | 0.053 |
|  | CDDP+Cape | 1 | 1.1 |  | 0 | 0 | 0.149 |
|  | CDDP+CPT-11 | 6 | 6.4 |  | 3 | 4.8 | 0.070 |
|  | CDDP+DTX | 2 | 2.1 |  | 1 | 1.6 | 0.037 |
|  | CDDP+DTX+5FU | 8 | 8.5 |  | 7 | 11.3 | 0.094 |
|  | CDDP+DTX+S-1 | 2 | 2.1 |  | 1 | 1.6 | 0.037 |
|  | CDDP+DXR | 3 | 3.2 |  | 1 | 1.6 | 0.105 |
|  | CDDP+DXR+MTX+VBL | 0 | 0 |  | 1 | 1.6 | 0.180 |
|  | CDDP+GEM | 9 | 9.6 |  | 2 | 3.2 | 0.264 |
|  | CDDP+NGT | 0 | 0 |  | 1 | 1.6 | 0.180 |
|  | CDDP+PEM | 4 | 4.3 |  | 2 | 3.2 | 0.058 |
|  | CDDP+PTX | 1 | 1.1 |  | 0 | 0 | 0.149 |
|  | CDDP+RT | 7 | 7.4 |  | 6 | 9.7 | 0.082 |
|  | CDDP+S-1 | 7 | 7.4 |  | 4 | 6.5 | 0.035 |
|  | CDDP+VNR | 16 | 17.0 |  | 15 | 24.2 | 0.179 |
|  | CDDP+VP-16 | 11 | 11.7 |  | 8 | 12.9 | 0.037 |

**Supplementary Table S2. Patient Characteristics**

|  |  | ATT weighting | | | | |  | ATC weighting | | | | |
| --- | --- | --- | --- | --- | --- | --- | --- | --- | --- | --- | --- | --- |
|  |  | Metformin | | SGLT2i | | SMD |  | Metformin | | SGLT2i | | SMD |
|  |  | ESS=62 | | ESS=62 | |  |  | ESS=94 | | ESS=81.7 | |  |
| SEX | Female, % | 19.9 |  | 19.4 |  | 0.013 |  | 19.2 |  | 19.4 |  | 0.005 |
| Age | Mean (SD) | 65.7 | (6.6) | 65.4 | (8.1) | 0.040 |  | 65.4 | (8.8) | 64.7 | (9.9) | 0.075 |
| BMI | Mean (SD) | 25.2 | (3.7) | 24.7 | (3.8) | 0.153 |  | 23.9 | (4.1) | 24.1 | (4.2) | 0.049 |
| Cardiac disease | Yes, % | 14.7 |  | 11.3 |  | 0.101 |  | 12.8 |  | 13.0 |  | 0.006 |
| Hypertension | Yes, % | 61.0 |  | 62.9 |  | 0.041 |  | 46.8 |  | 39.6 |  | 0.146 |
| Chemotherapy history | Yes, % | 11.9 |  | 9.7 |  | 0.073 |  | 23.4 |  | 23.3 |  | 0.002 |
| eGFR, mL/min | Mean (SD) | 80.0 | (13.2) | 77.5 | (20.4) | 0.145 |  | 78.3 | (20.7) | 79.8 | (21.9) | 0.07 |
| Alb level, g/dL | Mean (SD) | 4.0 | (0.5) | 4.0 | (0.4) | 0.085 |  | 4.0 | (0.6) | 4.0 | (0.7) | 0.082 |
| ALT, U/L | Mean (SD) | 24.3 | (12.5) | 20.7 | (17.0) | 0.243 |  | 25.8 | (19.4) | 20.8 | (19.3) | 0.257 |
| AST, U/L | Mean (SD) | 23.8 | (10.3) | 21.3 | (12.4) | 0.213 |  | 24.9 | (17.5) | 20.0 | (10.4) | 0.32 |
| HbA1c, % | Mean (SD) | 6.7 | (0.8) | 6.8 | (0.9) | 0.023 |  | 7.1 | (1.2) | 7.0 | (1.2) | 0.083 |
| K level, mEq/L | Mean (SD) | 4.2 | (0.3) | 4.1 | (0.3) | 0.160 |  | 4.3 | (0.4) | 4.3 | (0.4) | 0 |
| Antidiabetic drugs | αGI, % | 6.7 |  | 3.2 |  | 0.158 |  | 11.7 |  | 1.6 |  | 0.414 |
|  | GLP1 RA, % | 15.3 |  | 14.5 |  | 0.023 |  | 6.4 |  | 16.5 |  | 0.321 |
|  | Insulin, % | 13.5 |  | 14.5 |  | 0.029 |  | 17.0 |  | 20.8 |  | 0.097 |
|  | SU or Glinides, % | 15.7 |  | 12.9 |  | 0.080 |  | 18.1 |  | 10.6 |  | 0.215 |
|  | Thiazolidine, % | 4.1 |  | 0.0 |  | 0.291 |  | 4.3 |  | 0 |  | 0.300 |
| CDDP dose, mg/m2 | Mean (SD) | 73.6 | (8.4) | 73.0 | (10.5) | 0.059 |  | 72.2 | (10.1) | 71.8 | (14.9) | 0.032 |
| Chemotherapy cycle | Mean (SD) | 3.0 | (1.2) | 2.7 | (1.7) | 0.174 |  | 2.7 | (1.5) | 2.9 | (2.2) | 0.107 |
| Short hydration | Yes, % | 21.6 |  | 27.4 |  | 0.135 |  | 23.4 |  | 24.1 |  | 0.016 |
| Diuretic | Yes, % | 89.0 |  | 95.2 |  | 0.230 |  | 87.2 |  | 89.2 |  | 0.062 |
| Mg supplementation | Yes, % | 73.9 |  | 74.2 |  | 0.007 |  | 70.2 |  | 67.4 |  | 0.060 |
| Concomitant drugs | ACE inhibitor, % | 1.6 |  | 1.6 |  | 0.002 |  | 4.3 |  | 4.2 |  | 0.005 |
|  | ARB, % | 48.4 |  | 50.0 |  | 0.032 |  | 20.2 |  | 23.3 |  | 0.075 |
|  | MATE inhibitor, % | 3.5 |  | 6.5 |  | 0.138 |  | 7.5 |  | 5.4 |  | 0.082 |
|  | NSAIDs, % | 24.7 |  | 19.4 |  | 0.128 |  | 11.7 |  | 14.1 |  | 0.072 |
|  | PPI, % | 38.8 |  | 37.1 |  | 0.035 |  | 18.1 |  | 20.7 |  | 0.066 |

**Supplementary Table S3. Severity of nephrotoxicity (CTCAE ver.5)**

|  | ATT weighting | | |  | ATC weighting | | |
| --- | --- | --- | --- | --- | --- | --- | --- |
|  | Metformin, % | SGLT2i, % | *P* |  | Metformin, % | SGLT2i, % | *P* |
| WNL | 56.7 | 74.2 | 0.029 |  | 54.2 | 86.1 | 0.017 |
| Grade 1 | 42.0 | 17.7 |  | 42.6 | 9.3 |
| Grade 2 | 1.3 | 8.1 |  | 3.2 | 4.6 |

**Supplementary Table S4. Percentage change in sCr, CCr and eGFR**

|  | sCr, median (IQR) | | |  | CCr, median (IQR) | | |  | eGFR, median (IQR) | | |
| --- | --- | --- | --- | --- | --- | --- | --- | --- | --- | --- | --- |
|  | Metformin | SGLT2i | *P* |  | Metformin | SGLT2i | *P* |  | Metformin | SGLT2i | *P* |
| ATT weighting | 31.2  (10.3, 61.4) | 17.2  (7.2, 33.5) | 0.010 |  | -23.4  (-38.8, -10.1) | -14.6  (-25.1, -6.7) | 0.010 |  | -25.7  (-41.6, -11.0) | -15.9  (-27.1, -7.3) | 0.010 |
| ATC  weighting | 25.9  (12.1, 56.3) | 15.4  (7.3, 31.3) | <0.001 |  | -20.6  (-36.0, -10.8) | -13.3  (-23.8, -6.4) | <0.001 |  | -22.3  (-38.7, -11.7) | -14.5  (-25.7, -6.9) | <0.001 |

**Supplementary Table S5. Multivariate analysis of risk factors for nephrotoxicity**

|  | ATT weighting | | | |  | ATC weighting | | | |
| --- | --- | --- | --- | --- | --- | --- | --- | --- | --- |
|  | OR | 95%CI | | *P* |  | OR | 95%CI | | *P* |
| Age | 0.955 | 0.902 | 1.012 | 0.111 |  | 0.957 | 0.914 | 1.003 | 0.057 |
| Female | 1.354 | 0.457 | 4.014 | 0.587 |  | 1.459 | 0.533 | 3.994 | 0.462 |
| Hypertension | 1.819 | 0.757 | 4.374 | 0.181 |  | 1.969 | 0.941 | 4.118 | 0.072 |
| Cardiac disease | 4.359 | 1.241 | 15.314 | 0.022 |  | 2.833 | 0.999 | 8.027 | 0.049 |
| Mg supplementation | 1.079 | 0.39 | 2.989 | 0.883 |  | 0.944 | 0.413 | 2.156 | 0.891 |
| CDDP dose | 1.018 | 0.975 | 1.064 | 0.408 |  | 1.005 | 0.969 | 1.041 | 0.799 |
| SGLT2i group | 0.429 | 0.19 | 0.97 | 0.042 |  | 0.181 | 0.082 | 0.397 | <0.001 |

**Supplementary Table S6. Patient Characteristics stratified by presence or absence of concomitant use metformin with SGLT2 inhibitor**

|  |  | Presence of metformin | | | | |  | Absence of metformin | | | | |
| --- | --- | --- | --- | --- | --- | --- | --- | --- | --- | --- | --- | --- |
|  |  | Metformin | | SGLT2i+Metformin | | SMD |  | Metformin | | SGLT2i | | SMD |
|  |  | ESS=90.6 | | ESS=23.3 | |  |  | ESS=87.8 | | ESS=30.8 | |  |
| SEX | Female, % | 20.5 |  | 23.6 |  | 0.075 |  | 16.6 |  | 11.2 |  |  |
| Age | Mean (SD) | 64.8 | (9.1) | 62.5 | (7.5) | 0.259 |  | 65.7 | (8.3) | 66.1 | (7.2) | 0.049 |
| BMI | Mean (SD) | 24.4 | (4.3) | 25.6 | (4.0) | 0.277 |  | 23.9 | (3.0) | 23.9 | (3.0) | 0 |
| Cardiac disease | Yes, % | 12.2 |  | 11.5 |  | 0.022 |  | 14.3 |  | 11.3 |  | 0.090 |
| Hypertension | Yes, % | 48.2 |  | 45.4 |  | 0.056 |  | 48.4 |  | 37.4 |  | 0.224 |
| Chemotherapy history | Yes, % | 21.2 |  | 19.5 |  | 0.042 |  | 16.2 |  | 25.1 |  | 0.221 |
| eGFR, mL/min | Mean (SD) | 78.2 | (18.9) | 83.4 | (20.0) | 0.269 |  | 78.2 | (18.1) | 83.7 | (19.2) | 0.297 |
| Alb level, g/dL | Mean (SD) | 4.0 | (0.6) | 4.1 | (0.5) | 0.246 |  | 4.0 | (0.5) | 4.1 | (0.4) | 0.173 |
| ALT, U/L | Mean (SD) | 25.8 | (19.8) | 17.7 | (11.6) | 0.437 |  | 25.1 | (18.0) | 27.5 | (20.2) | 0.128 |
| AST, U/L | Mean (SD) | 24.3 | (15.7) | 17.9 | (8.0) | 0.439 |  | 23.4 | (14.1) | 23.5 | (9.9) | 0.009 |
| HbA1c, % | Mean (SD) | 7.1 | (1.2) | 6.9 | (0.8) | 0.114 |  | 7.0 | (1.2) | 6.8 | (1.0) | 0.172 |
| K level, mEq/L | Mean (SD) | 4.2 | (0.4) | 4.3 | (0.3) | 0.139 |  | 4.3 | (0.3) | 4.3 | (0.3) | 0 |
| Antidiabetic drugs | αGI, % | 9.8 |  | 2.0 |  | 0.336 |  | 10.1 |  | 1.6 |  | 0.368 |
|  | GLP1 RA, % | 8.1 |  | 27.9 |  | 0.553 |  | 8.2 |  | 26.0 |  | 0.487 |
|  | Insulin, % | 15.8 |  | 18.7 |  | 0.077 |  | 18.2 |  | 36.9 |  | 0.428 |
|  | SU or Glinides, % | 18.9 |  | 9.0 |  | 0.286 |  | 17.2 |  | 8.7 |  | 0.255 |
|  | Thiazolidine, % | 0.4 |  | 0 |  | 0.289 |  | 4.9 |  | 0 |  | 0.321 |
| CDDP dose, mg/m2 | Mean (SD) | 71.8 | (10.2) | 70.7 | (11.1) | 0.105 |  | 73.4 | (10.0) | 72.4 | (10.9) | 0.097 |
| Chemotherapy cycle | Mean (SD) | 2.8 | (1.5) | 3.2 | (1.8) | 0.286 |  | 2.8 | (1.5) | 2.9 | (1.6) | 0.065 |
| Short hydration | Yes, % | 23.2 |  | 27.9 |  | 0.108 |  | 23.0 |  | 20.8 |  | 0.053 |
| Diuretic | Yes, % | 88.9 |  | 86.3 |  | 0.079 |  | 91.7 |  | 100 |  | 0.425 |
| Mg supplementation | Yes, % | 69.6 |  | 66.3 |  | 0.071 |  | 71.1 |  | 79.3 |  | 0.191 |
| Concomitant drugs | ACE inhibitor, % | 4.4 |  | 4.0 |  | 0.020 |  | 3.3 |  | 0 |  | 0.261 |
|  | ARB, % | 25.9 |  | 30.6 |  | 0.105 |  | 26.9 |  | 26.2 |  | 0.016 |
|  | MATE inhibitor, % | 7.5 |  | 5.0 |  | 0.103 |  | 5.4 |  | 5.3 |  | 0.004 |
|  | NSAIDs, % | 14.9 |  | 14.5 |  | 0.011 |  | 11.7 |  | 9.5 |  | 0.072 |
|  | PPI, % | 21.6 |  | 25.9 |  | 0.101 |  | 21.6 |  | 23.2 |  | 0.038 |

**Supplementary Table S7. Severity of nephrotoxicity (CTCAE ver.5) stratified by presence or absence of concomitant use metformin with SGLT2 inhibitor**

|  | Metformin, % | SGLT2i+Metformin, % | *P* |  | Metformin, % | SGLT2i, % | *P* |
| --- | --- | --- | --- | --- | --- | --- | --- |
|  | ESS=90.6 | ESS=23.3 |  |  | ESS=87.8 | ESS=30.8 |  |
| WNL | 55.9 | 87.0 | 0.006 |  | 54.7 | 85.0 | 0.041 |
| Grade 1 | 41.1 | 13.0 |  | 42.6 | 6.4 |
| Grade 2 | 3.0 | 0 |  | 2.7 | 8.6 |

**Supplementary Table S8. Percentage change in sCr, CCr and eGFR stratified by presence or absence of concomitant use metformin with SGLT2 inhibitor**

| sCr, median (IQR) | | |  | CCr, median (IQR) | | |  | eGFR, median (IQR) | | |
| --- | --- | --- | --- | --- | --- | --- | --- | --- | --- | --- |
| Metformin | SGLT2i  +Metformin | *P* |  | Metformin | SGLT2i  +Metformin | *P* |  | Metformin | SGLT2i  +Metformin | *P* |
| 25.5  (11.2, 56.3) | 16.5  (7.0, 31.0) | 0.026 |  | -20.3  (-36.0, -10.1) | -14.2  (-23.7, -6.5) | 0.026 |  | -22.0  (-38.7, -11.0) | -15.4  (-25.6, -7.1) | 0.026 |
| Metformin | SGLT2i | *P* |  | Metformin | SGLT2i | *P* |  | Metformin | SGLT2i | *P* |
| 26.6  (12.3, 56.3) | 8.2  (7.3, 31.5) | 0.008 |  | -21.0  (36.0, -11.0) | -8.9  (-26.2, -6.8) | 0.008 |  | -22.7  (-38.7, -12.0) | -9.7  (-28.3, -7.4) | 0.008 |
